# Supplementary material for: Enzyme kinetics by GH7 cellobiohydrolases on chromogenic substrates is dictated by non‐productive binding: insights from crystal structures and MD simulation
Source: PubMed Central journal article supplement — FEBS J. 2022 Sep 6;290(2):379–99. doi: 10.1111/febs.16602 (PMC10087753; doi:10.1111/febs.16602), 2022-09-06
Supplement: FEBS-290-379-s001.pdf [file FEBS-290-379-s001.pdf]

# Enzyme kinetics by GH7 cellobiohydrolases on chromogenic substrates is dictated by non-productive binding: Insights from crystal structures and MD simulation

Topi Haataja<sup>1</sup>, Japheth E. Gado<sup>2,3</sup>, Anu Nutt<sup>4,5</sup>, Nolan T. Anderson<sup>2</sup>, Mikael Nilsson<sup>6</sup>, Majid Haddad Momeni<sup>1</sup>, Roland Isaksson<sup>6</sup>, Preet Våljamäe<sup>5</sup>, Gunnar Johansson<sup>4,\*</sup>, Christina M. Payne<sup>2,\*</sup>, Jerry Ståhlberg<sup>1,\*</sup>

1 Department of Molecular Sciences, Swedish University of Agricultural Sciences, PO box 7015, SE-750 07 Uppsala, Sweden.

2 Department of Chemical and Materials Engineering, University of Kentucky, Lexington, KY 40506, USA.

3 Renewable Resources and Enabling Sciences Center, National Renewable Energy Laboratory, Golden, CO 80401, USA.

4 Department of Chemistry, Uppsala University, PO box 576, SE-751 23 Uppsala, Sweden.

5 Institute of Molecular and Cell Biology, University of Tartu, Riia 23, Tartu 51010, Estonia.

6 Institute of Chemistry and Biomedical Sciences, Linnaeus University, SE-391 82 Kalmar, Sweden.

\* Corresponding authors: Jerry Ståhlberg ([Jerry.Stahlberg@slu.se](mailto:Jerry.Stahlberg@slu.se)); Christina M. Payne ([Christy.Payne@uky.edu](mailto:Christy.Payne@uky.edu)); Gunnar Johansson ([Gunnar.Johansson@kemi.uu.se](mailto:Gunnar.Johansson@kemi.uu.se))

## Supplementary Information

**Supplementary Figure S1.** Snapshots at 500 ps of MD simulation of substrate binding in productive mode at subsites -2/-1/+1 in TrCel7A and PcCel7D.

**Supplementary Figure S2.** Snapshots at 500 ps of MD simulation of substrate binding in non-productive mode at subsites +1/+2/+3 in TrCel7A and PcCel7D.

**Supplementary Figure S3.** Plots of distances between substrate and catalytic amino acids during 10 ns and 100 ns of MD simulations of productive binding mode at subsites -2/-1/+1 of pNPC, pNPL and oNPC, in TrCel7A and in PcCel7D.



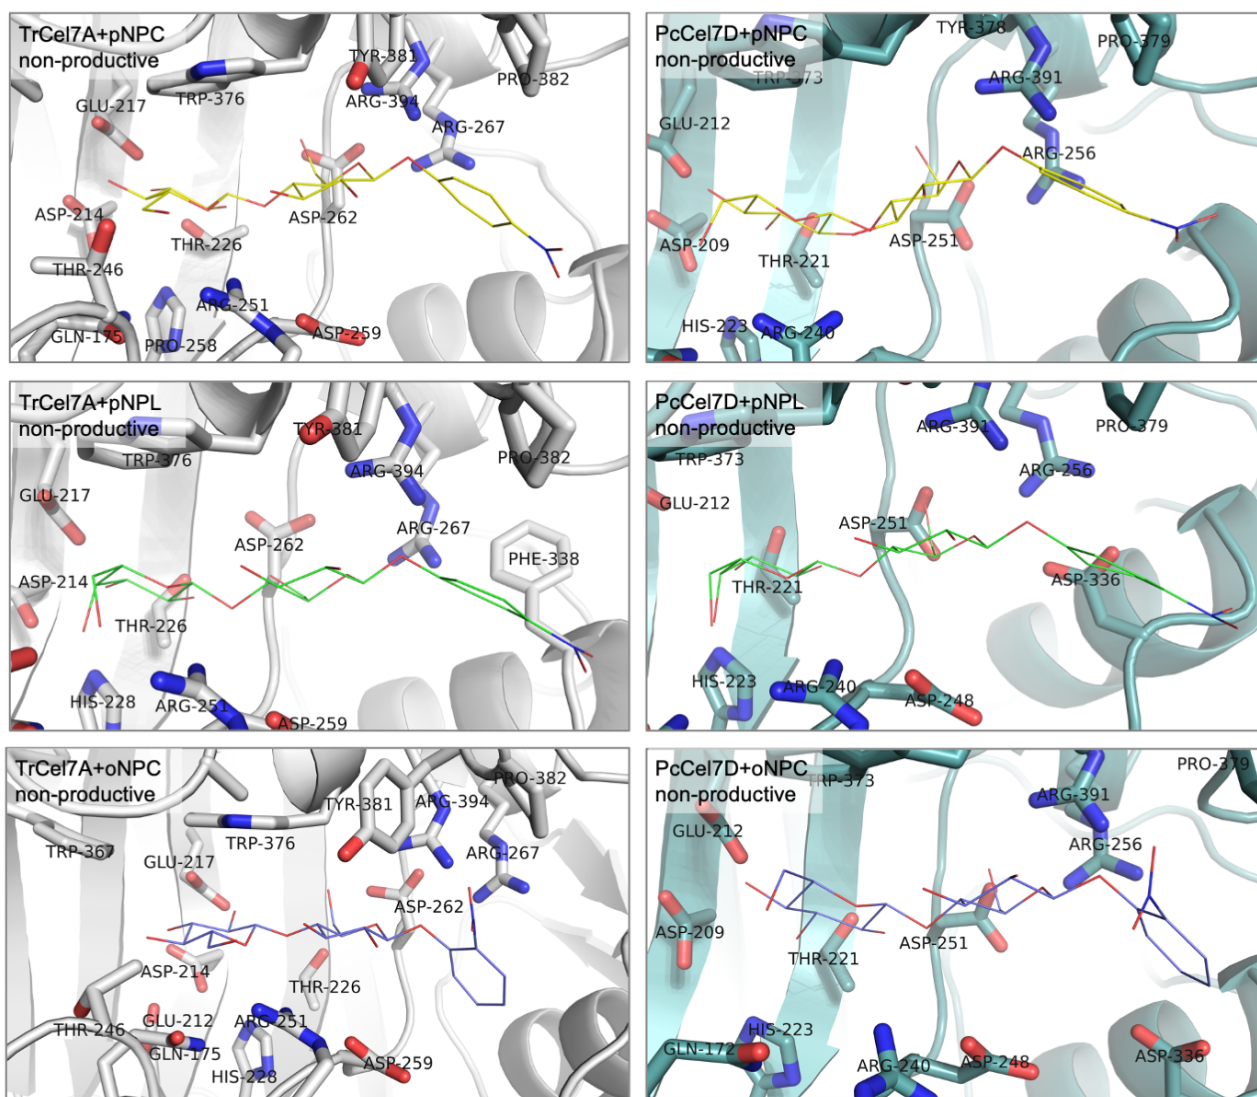

**Supplementary Figure S2.** Snapshots at 500 ps of MD simulation of substrate binding in non-productive mode at subsites +1/+2/+3 in TrCel7A (white; left) and PcCel7D (teal; right)

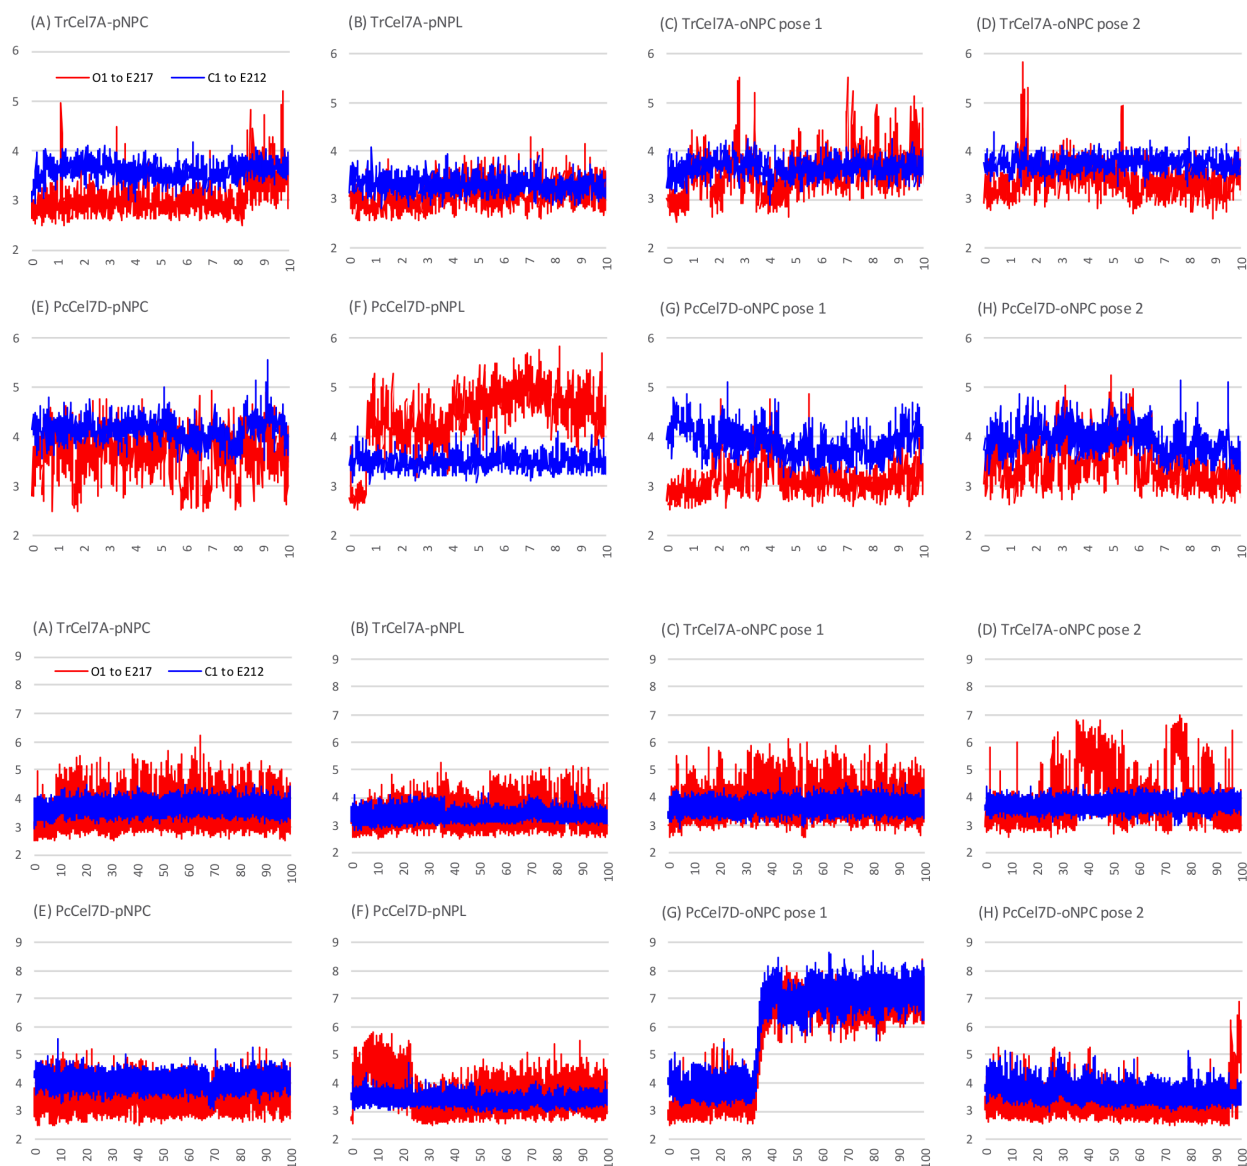

**Supplementary Figure S3.** Plots of distances ( $\text{\AA}$ ) between substrate and catalytic amino acids during 10 ns (top) and 100 ns (bottom) of MD simulations of productive binding mode at subsites -2/-1/+1 of pNPC, pNPL and oNPC, in TrCel7A (A-D) and in PcCel7D (E-H). The red line shows the shortest distance from the glycosidic oxygen O1 to the nearest O atom of the catalytic acid/base (Glu/E217 in TrCel7A; Glu/E212 in PcCel7D). The blue line shows the shortest distance from the anomeric carbon C1 to the nearest O atom of the catalytic nucleophile (Glu/E212 in TrCel7A; Glu/E207 in PcCel7D).
